# Supplementary material for: insomniac links the development and function of a sleep-regulatory circuit
Source: eLife. 2021 Dec 15;10:e65437. doi: 10.7554/eLife.65437 (PMC8758140; doi:10.7554/eLife.65437)
Supplement: Source data 1. [file elife-65437-supp1.xlsx]

## Sheet: Fig 2B
Figure 2B
Mean sleep per day (min)
		inc[1]; UAS-inc-HA/tub-QS; nsyb-Gal4QF/+
Control (BL5905 w[1118])	inc[1]; UAS-inc-HA/+	Vehicle	Constitutive	Adult	Developmental	3rd instar larval to adult	Pulse (3rd instar larval to pupal)
1188.6	634	828	1134.6	709.4	1021.8	790.4	996
951.2	916.8	757.6	872.8	688.6	970.2	844.4	1051
969.8	677.4	538	1013.4	689.6	1106.6	1018	909.2
1136.6	801.4	650.4	947.6	679.4	1096.8	926.6	949.2
1196.4	510.2	683.8	958.2	724.6	814.2	1161	957.6
1073.8	938.6	755.4	878.2	631.4	1035.2	986.8	1135
1145	788.2	627.6	951.2	764.6	1146.2	1106.8	838
979	776.2	828	1048.4	904.8	1124.2	1097.6	1067.2
1060.4	753.2	841	919	789.4	1074.8	981	1023.6
964.6	587.8	624.2	1047.4	775.4	943.6	1058.8	974.4
994.2	736.8	818	1076.2	673	1101	839	908
1175.4	820	904.6	858.8		1042.6	697.8	1069.6
1043.4	570.8	549.4	823.6		1052.4	633.4	699.6
1076.6	834.2	483.8	783.4		842.4	1042.4	857.4
1098.6	872.6	690.8	1111		767.8	975.2	970.4
1058.6	668.8	724.6	982.4		1041.6	790	845.2
1092.2	749.6	729.6	1024.6		1044.8	1089.6	1102.2
1164	877.6	504.4	809.6		1119	1024.8	1136.4
1172.6	838.6	648.6	1092.2		1112.8	879.4	1048.4
998.6	800.4	711	1042		1048.8	1089.6	967
1232.6	414	801.8	998.4		1076.8	1044	1070.6
1112.2	914	665	1074.2		804.2	1048.8	1063.2
1154.4	676	637.4	966.6		1049.4	806.6	1196
1162.6	1019.6	557.6	1034.6		1112.4	863.4	1028.2
1081.6	775.2	641.6	978.6		1088.6	987.6	1076.2
1113.8	718.2	823.4	908.2		1208	923.8	987.8
1222.2	785.4	480.4	934.4		1117.6	1069.8	810.2
1010.8	679.4	792.8	976.2			989	1126.4
1097.8	682.8	818.4	983.4				713.2
1166.2	868.2	697.6	898.8				931
1106.2	741.6	759.8	905.8				893.6
1011.4	771.8	666.4	728.8				986.8
1000.4	614.8	662.2	909
1168.6	683	802.4	695.2
1034.8	938	836.2	880.8
1035.8	499.4	623	736
1200.2	680.2	695.2	1094.2
1095.4	686	760.6	960.8
1165.4	815	509.8	1026
1065.2	566.4	835.4	1067.8
1096.4	692.6	756.4	1043
1138.6	741.2	839.8	893
1023.2	872.2	728	981.4
1033.2	777.6	726.6	939.6
1112.4	738.6	972.8	944
1086.8	770.8	816	1106.4
1127.6	780.6	626.4	942
1133	629.2	584.6	1033.4
1059.8	810.6	827.4	1031.4
1051.4	637	663.2	1163.2
1061	793.6	612.4	997.6
1063.6	909.8	440.2	988
946	514.4	769.4	824.2
1030.4	719.6	803.2	930.4
987	802.8	742.8	1089.8
1134.6	593.2	553.2	1060.8
1192	400	671.8	914.4
1080.8	888.4	674.6	870.4
1158	586.6	813.8	752
1098.8	685.8	662.8	1044.6
1078.8	679.2	676.4	995.6
1150.6	686	612
1208.6	513.2	630.6
1160.6	519.4	543.2
1066	1013.6	1046.8
919.6	821.6	408.4
1117.8	941.2	559.6
949.2	691.6	794.4
935.6	788.2	444
1174.6	962.8	1032.8
1013.8	828.2	692.2
1103.8	872.8	729.4
1071	768.4	1131.6
1082.6	825	600.4
1035.4	638	757
1099.4	584.4	666.2
1072		780
1083.8		237.8
1038.2		334.2
1098.6		975.4
1106.4		518.2
1033.2		1068.2
1109.8		1011.2
1140.2		857.4
		968.2
		1021.4

## Sheet: Fig 2C
Figure 2C
Mean +/- SEM sleep (min/hr)
	Control (BL5905 w[1118])		inc[1]; UAS-inc-HA/+		inc[1]; UAS-inc-HA/tub-QS; nsyb-Gal4QF/+
					Vehicle		Constitutive		Adult		Developmental		3rd instar larval to adult		Pulse (3rd instar larval to pupal)
ZT	Mean	SEM	Mean	SEM	Mean	SEM	Mean	SEM	Mean	SEM	Mean	SEM	Mean	SEM	Mean	SEM
0 - 1	8.2	1	13.6	1.2	7.4	0.7	12.9	1.4	8.5	1.7	21.2	1.8	9.4	1.2	11.7	1.6
1 - 2	31.4	1.9	31.7	1.6	21.4	1.3	24.6	1.5	16.7	2.3	26.6	2.8	30.9	1.7	34.8	2.4
2 - 3	51.6	0.9	43.6	1.2	34.9	1.5	41.1	1.4	28.8	2.5	46.6	1.8	44.6	1.5	46.4	1.9
3 - 4	57.7	0.3	48	0.8	41.3	1.2	47.4	1	30.9	1.8	53.1	1.3	48.5	1.4	51.6	1.3
4 - 5	57.7	0.3	48	0.8	43.8	1	49.9	1	37.1	1.4	56.7	0.8	50	1.5	51.8	1.3
5 - 6	58	0.3	48.4	0.9	46	0.9	52.4	0.7	39.4	1.5	57.7	0.6	54	1.1	52.9	1.2
6 - 7	56.5	0.5	45.8	0.9	44.4	1	53.8	0.7	39.5	1.6	57.9	0.7	52.7	1.4	55.2	1
7 - 8	56.5	0.4	35.3	1.3	38.6	1.2	53.7	0.7	41.7	1.2	56.5	0.9	52.6	1.3	52.1	1.2
8 - 9	54.3	0.6	21.9	1.4	27.4	1.1	50.4	0.8	36.6	1.3	52.4	1.5	46.1	1.7	46.7	1.7
9 - 10	45.3	1.2	11.3	1.2	15.7	0.8	41.4	1.1	27.6	1.9	40.5	2.2	36.1	2.1	38.7	1.9
10 - 11	22.9	1.5	4.9	1	7.2	0.7	25.2	1.3	16.7	1.6	24.8	2.4	18.5	2.1	22.9	2
11 - 12	4.6	0.8	2	0.5	2.6	0.4	10.8	1.1	7.9	1.5	7.2	1.4	9.3	2	9.1	1.4
12 - 13	17.9	1.5	10.8	1.2	8.6	0.9	14.4	1.5	13.6	1.4	10	2.1	14.5	1.7	10.4	2
13 - 14	53.3	0.9	42.7	2	44.6	1.4	48.6	1.4	38.3	2.8	49.2	2.7	50.5	1.6	50	2.1
14 - 15	57.5	0.3	47.2	1.3	50.3	0.7	53.8	0.8	42.7	2.2	57.3	0.6	52.7	1.4	56.5	0.9
15 - 16	56.4	0.4	42.4	1.1	44.8	0.8	51.3	1.1	40.1	2.1	55.1	0.7	51.1	1.4	54.3	1.3
16 - 17	56.1	0.4	36.3	1.2	38.5	0.9	50	1	37.9	2.3	53.5	1.1	49.4	1.6	53	1.4
17 - 18	54.4	0.5	34.8	1.1	35.9	0.9	49.1	1	37.6	1.4	51.3	1.5	48.3	1.4	50.7	1.3
18 - 19	54.8	0.5	32.8	1.3	34.3	0.8	47.6	1.1	37.1	1.8	50.4	1.3	47.1	1.7	48.6	1.4
19 - 20	54.9	0.5	37.5	1	36.3	0.9	45.8	1	36	1.8	50.8	1.2	47.8	1.4	47.9	1.5
20 - 21	53.8	0.5	39.5	1	36.5	0.9	43.9	1	35.2	2	50	1.2	44.3	1.6	46.9	1.3
21 - 22	47.6	0.9	29.2	1.1	25.1	0.9	37.4	1	31.9	1.8	41.6	1.5	39.2	1.8	34.4	1.6
22 - 23	42.4	1.1	16.9	1.1	15.5	0.9	29.4	1.2	25.6	2	34.2	1.9	30.3	2	27.6	2.1
23 - 24	32.6	1.2	14.2	1.1	12.3	0.9	27.2	1.3	22.6	2	31.2	1.9	28.4	2	26.9	1.8

## Sheet: Fig 2–S1
Figure 2–Figure supplement 1
Panel A: Mean nighttime sleep per day (min)
		inc[1]; UAS-inc-HA/tub-QS; nsyb-Gal4QF/+
Control (BL5905 w[1118])	inc[1]; UAS-inc-HA/+	Vehicle	Constitutive	Adult	Developmental	3rd instar larval to adult	Pulse (3rd instar larval to pupal)
599.2	334.2	402	590.4	377.6	534	394	475.2
472	470.8	457.4	405.6	364.6	491.8	427.6	556.2
476	364.2	325.8	537.2	374	561.8	545.8	500.4
578.6	454.6	297.6	507	324.2	516.6	477.4	525
653	300.8	312	424.4	441.6	474	608.4	495
599	502.2	474	436	336.6	553.6	534.6	531.6
610.6	400.8	358.2	464	410.2	643.6	572	506
537.2	434.2	488.4	543.2	508	599.2	597	555.6
551.2	521.6	496.8	441.6	416.2	559	471.2	554.6
478	320.8	379.6	506.8	463.6	492.6	538	484.8
508.4	381.2	415.4	588	402.4	593.2	442.4	444.2
628.2	419.2	481.2	476		580.8	351.8	553.8
615.4	276.4	276	393.8		541.4	344	408.6
546.6	450.2	193.2	411.6		395.8	592.6	507.2
560.8	462.2	420.8	620.6		366.2	505.8	521.2
573.4	422.8	430	524.6		538.4	430.6	448.6
605.6	420.4	435.2	582.6		619.8	598	607
661.6	497.2	320.6	474.8		627	541.2	592.2
634.2	482.6	417.2	632		567.4	440.8	522.6
535.8	440	414	565.6		572.4	604.8	482.6
701	184.4	432.8	531		617	528	508.4
631	518.4	367.2	575.8		412.4	527.6	552.2
650	394.6	355.2	470.4		565.2	375.4	609.8
593.8	594	379.6	547		642.4	440.2	553
595.8	464	373.8	455.6		578.8	564	572.2
648.8	402.4	515.6	493.8		636	500.8	467
701	447.6	242.2	488.4		585.6	570.4	358
532.4	348.6	471.6	578.2			606.8	547
575.8	376	470.2	533.6				383.2
662.8	444.6	428.2	524.6				479.4
595.8	397.8	447	455				471.6
559.4	381.8	328.2	360.2				546.6
489	302.8	351.8	490.2
632.6	355.8	416	336.8
577.8	526.8	455.2	482.2
581.6	242.6	327	363.6
664.4	422.2	382.4	601.6
572.6	333	443	509
666	434	277.2	576.6
588.8	270.2	427	528.8
617.4	339	521	518.4
593.6	385.8	423.8	486.4
605.8	518.4	348.4	549.2
599	417.2	338	461.4
607.4	323.2	491.6	512.8
611.2	425	412	582
621.2	423	370.2	532.6
614.8	315.6	371	526
552.4	462.2	448.4	594.2
577.4	411.8	329.4	633.2
553.2	412.4	345.6	524
594.4	525.8	277.4	519
487.2	300.8	458.8	386.6
551	378.8	463.4	557.6
525.6	323.2	408.4	583.2
597.2	234.6	380.8	608.6
621	177	388.2	476.6
579.8	397.8	356.4	452.4
644.2	209	450.2	310.4
568.8	280	385.8	497.2
615.8	339.2	411	574.8
648	286.8	307.4
679.2	244.2	196.2
619	275	245.2
578	446	523.8
489.8	462.6	188.2
609	335.6	351.6
419.8	281.6	424.6
534.2	419.2	218.2
658.8	561.6	573.8
569.6	452.8	390.8
585	492.8	367.8
568.8	455.6	564.6
611.4	463.2	307.2
530.4	355.8	306.2
598.2	312.4	323.8
535.8		413.6
583.4		91
564.4		140.2
620.4		449.8
606		208.8
552		548.6
579.6		544.2
603.6		398.6
		519.4
		528.4
Panel B: Mean daytime sleep per day (min)
		inc[1]; UAS-inc-HA/tub-QS; nsyb-Gal4QF/+
Control (BL5905 w[1118])	inc[1]; UAS-inc-HA/+	vehicle	constitutive	Adult ON	Development ON	3rd instar larval to adult ON	Pulse (3rd instar larval to pupal)
589.4	299.8	426	544.2	331.8	487.8	396.4	520.8
479.2	446	300.2	467.2	324	478.4	416.8	494.8
493.8	313.2	212.2	476.2	315.6	544.8	472.2	408.8
558	346.8	352.8	440.6	355.2	580.2	449.2	424.2
543.4	209.4	371.8	533.8	283	340.2	552.6	462.6
474.8	436.4	281.4	442.2	294.8	481.6	452.2	603.4
534.4	387.4	269.4	487.2	354.4	502.6	534.8	332
441.8	342	339.6	505.2	396.8	525	500.6	511.6
509.2	231.6	344.2	477.4	373.2	515.8	509.8	469
486.6	267	244.6	540.6	311.8	451	520.8	489.6
485.8	355.6	402.6	488.2	270.6	507.8	396.6	463.8
547.2	400.8	423.4	382.8		461.8	346	515.8
428	294.4	273.4	429.8		511	289.4	291
530	384	290.6	371.8		446.6	449.8	350.2
537.8	410.4	270	490.4		401.6	469.4	449.2
485.2	246	294.6	457.8		503.2	359.4	396.6
486.6	329.2	294.4	442		425	491.6	495.2
502.4	380.4	183.8	334.8		492	483.6	544.2
538.4	356	231.4	460.2		545.4	438.6	525.8
462.8	360.4	297	476.4		476.4	484.8	484.4
531.6	229.6	369	467.4		459.8	516	562.2
481.2	395.6	297.8	498.4		391.8	521.2	511
504.4	281.4	282.2	496.2		484.2	431.2	586.2
568.8	425.6	178	487.6		470	423.2	475.2
485.8	311.2	267.8	523		509.8	423.6	504
465	315.8	307.8	414.4		572	423	520.8
521.2	337.8	238.2	446		532	499.4	452.2
478.4	330.8	321.2	398			382.2	579.4
522	306.8	348.2	449.8				330
503.4	423.6	269.4	374.2				451.6
510.4	343.8	312.8	450.8				422
452	390	338.2	368.6				440.2
511.4	312	310.4	418.8
536	327.2	386.4	358.4
457	411.2	381	398.6
454.2	256.8	296	372.4
535.8	258	312.8	492.6
522.8	353	317.6	451.8
499.4	381	232.6	449.4
476.4	296.2	408.4	539
479	353.6	235.4	524.6
545	355.4	416	406.6
417.4	353.8	379.6	432.2
434.2	360.4	388.6	478.2
505	415.4	481.2	431.2
475.6	345.8	404	524.4
506.4	357.6	256.2	409.4
518.2	313.6	213.6	507.4
507.4	348.4	379	437.2
474	225.2	333.8	530
507.8	381.2	266.8	473.6
469.2	384	162.8	469
458.8	213.6	310.6	437.6
479.4	340.8	339.8	372.8
461.4	479.6	334.4	506.6
537.4	358.6	172.4	452.2
571	223	283.6	437.8
501	490.6	318.2	418
513.8	377.6	363.6	441.6
530	405.8	277	547.4
463	340	265.4	420.8
502.6	399.2	304.6
529.4	269	434.4
541.6	244.4	298
488	567.6	523
429.8	359	220.2
508.8	605.6	208
529.4	410	369.8
401.4	369	225.8
515.8	401.2	459
444.2	375.4	301.4
518.8	380	361.6
502.2	312.8	567
471.2	361.8	293.2
505	282.2	450.8
501.2	272	342.4
536.2		366.4
500.4		146.8
473.8		194
478.2		525.6
500.4		309.4
481.2		519.6
530.2		467
536.6		458.8
		448.8
		493
Panel C: Mean sleep bout length (min)
		inc[1]; UAS-inc-HA/tub-QS; nsyb-Gal4QF/+
Control (BL5905 w[1118])	inc[1]; UAS-inc-HA/+	vehicle	constitutive	Adult ON	Development ON	3rd instar larval to adult ON	Pulse (3rd instar larval to pupal)
51.68	20.99	25.88	68.35	17.65	43.3	16.75	33.2
43.63	32.28	21.16	23.85	14.65	44.92	29.12	37.27
42.91	18.51	14.78	42.23	13.9	53.72	51.41	28.41
42.41	29.04	20.98	30.97	19.98	39.17	40.29	27.75
99.7	21.26	12.48	32.15	19.37	29.5	24.09	28.16
41.95	27.77	18.16	18.61	16.88	46.21	47.9	45.04
70.68	26.45	15.77	22.22	18.83	68.23	40.99	36.12
27.97	35.61	23.39	38.54	19.01	56.78	60.31	46
49.09	29.89	19.56	24.97	15.12	43.69	40.54	43.37
50.24	18.6	15.08	36.88	19.78	30.44	44.86	40.26
59.89	27.91	29.21	68.11	19.79	47.05	25.9	33.88
85.17	21.81	27.75	29.01		54.3	21.54	36.38
41.4	21.62	14.77	15.78		47.41	15.99	20.95
54.93	26.91	12.87	22.77		35.69	35.94	19.49
60.36	28.52	16.93	36.79		32.26	37.51	50.02
56.31	26.54	26.25	37.5		39.16	17.25	31.54
88.08	26.39	21.33	41.65		60.05	40.66	54.03
42.79	26.43	12.55	23.26		55.4	20.91	54.11
66.62	28.52	14.48	34.78		57.96	17.11	60.95
60.16	30.55	14	49.15		57.63	53.94	31.4
89.32	16.17	21.55	22.69		52.27	24.86	45.75
84.26	31.3	21.73	31.05		22.98	23.41	37.44
58.9	23.31	21.39	43.15		49.04	14.94	54.36
96.88	45.12	16.9	47.03		64.67	15.93	31.54
85.84	22.67	19.33	53.77		46.92	34.77	65.62
85.68	22.03	25.1	20.74		67.87	21.48	39.2
149.05	26.9	11.33	47.19		48.59	43.14	27.19
62.4	14.33	22.91	32.54			36.9	61.22
66.94	22.46	20.67	34.38				13.46
104.12	23.21	22.95	19.97				30.03
70.91	25.57	23.6	26.64				34.91
51.08	19.89	23.8	17.6				46.99
61.75	30.44	17.43	20.85
108.2	19.19	21.92	17.47
46.2	37.22	24.74	31.91
48.4	25.74	20.1	15.86
83.35	34.35	16.24	65.13
68.46	26.38	22.77	43.67
64.03	17.79	11.48	50.79
68.28	27.23	17.48	42.71
52.21	16.49	19.7	44.19
99.88	19.01	29.57	43.77
37.34	33.55	25.1	52.76
35.88	21.6	22.43	44.74
88.29	27.98	22.94	39.33
46.05	25.36	32.9	63.59
93.97	26.55	19.57	35.68
96.02	18.73	15.07	35.15
36.54	46.06	21.44	57.94
40.44	22.27	18.73	39.56
49.58	28.55	22.68	37.79
49.24	32.96	11.12	42.22
57.68	16.18	26.72	17.03
74.67	29.02	24.19	40.81
60.93	48.36	20.98	52.9
64.47	31.22	16.56	45.33
132.44	14.71	14.54	39.76
77.2	34.98	14.99	28.26
141.22	19.95	24.37	18.99
82	25.98	12.18	38.69
53.41	26.33	22.1	39.2
102.73	46.35	28.07
163.32	20.86	21.9
141.54	19.98	11.51
37.27	47.36	41.87
41.42	29.34	10.58
59.46	74.7	12.11
54.55	20.58	20.37
36.83	20.01	11.44
77.28	39.14	51.64
44.86	30.67	15.45
62.72	30.95	13.12
44.26	25.96	35.58
69.4	26.79	19.12
53.93	13.57	14.39
46.98	16.32	16.49
49.17		25.16
51.12		9.36
36.56		12.38
55.48		28.19
43.22		16.09
45.32		35.61
51.86		40.45
57.59		28.58
		28.48
		36.48
Panel D: Mean sleep bout number (per day)
		inc[1]; UAS-inc-HA/tub-QS; nsyb-Gal4QF/+
Control (BL5905 w[1118])	inc[1]; UAS-inc-HA/+	vehicle	constitutive	Adult ON	Development ON	3rd instar larval to adult ON	Pulse (3rd instar larval to pupal)
23	30.2	32	16.6	40.2	23.6	47.2	30
21.8	28.4	35.8	36.6	47	21.6	29	28.2
22.6	36.6	36.4	24	49.6	20.6	19.8	32
26.8	27.6	31	30.6	34	28	23	34.2
12	24	54.8	29.8	37.4	27.6	48.2	34
25.6	33.8	41.6	47.2	37.4	22.4	20.6	25.2
16.2	29.8	39.8	42.8	40.6	16.8	27	23.2
35	21.8	35.4	27.2	47.6	19.8	18.2	23.2
21.6	25.2	43	36.8	52.2	24.6	24.2	23.6
19.2	31.6	41.4	28.4	39.2	31	23.6	24.2
16.6	26.4	28	15.8	34	23.4	32.4	26.8
13.8	37.6	32.6	29.6		19.2	32.4	29.4
25.2	26.4	37.2	52.2		22.2	39.6	33.4
19.6	31	37.6	34.4		23.6	29	44
18.2	30.6	40.8	30.2		23.8	26	19.4
18.8	25.2	27.6	26.2		26.6	45.8	26.8
12.4	28.4	34.2	24.6		17.4	26.8	20.4
27.2	33.2	40.2	34.8		20.2	49	21
17.6	29.4	44.8	31.4		19.2	51.4	17.2
16.6	26.2	50.8	21.2		18.2	20.2	30.8
13.8	25.6	37.2	44		20.6	42	23.4
13.2	29.2	30.6	34.6		35	44.8	28.4
19.6	29	29.8	22.4		21.4	54	22
12	22.6	33	22		17.2	54.2	32.6
12.6	34.2	33.2	18.2		23.2	28.4	16.4
13	32.6	32.8	43.8		17.8	43	25.2
8.2	29.2	42.4	19.8		23	24.8	29.8
16.2	47.4	34.6	30			26.8	18.4
16.4	30.4	39.6	28.6				53
11.2	37.4	30.4	45				31
15.6	29	32.2	34				25.6
19.8	38.8	28	41.4				21
16.2	20.2	38	43.6
10.8	35.6	36.6	39.8
22.4	25.2	33.8	27.6
21.4	19.4	31	46.4
14.4	19.8	42.8	16.8
16	26	33.4	22
18.2	45.8	44.4	20.2
15.6	20.8	47.8	25
21	42	38.4	23.6
11.4	39	28.4	20.4
27.4	26	29	18.6
28.8	36	32.4	21
12.6	26.4	42.4	24
23.6	30.4	24.8	17.4
12	29.4	32	26.4
11.8	33.6	38.8	29.4
29	17.6	38.6	17.8
26	28.6	35.4	29.4
21.4	27.8	27	26.4
21.6	27.6	39.6	23.4
16.4	31.8	28.8	48.4
13.8	24.8	33.2	22.8
16.2	16.6	35.4	20.6
17.6	19	33.4	23.4
9	27.2	46.2	23
14	25.4	45	30.8
8.2	29.4	33.4	39.6
13.4	26.4	54.4	27
20.2	25.8	30.6	25.4
11.2	14.8	21.8
7.4	24.6	28.8
8.2	26	47.2
28.6	21.4	25
22.2	28	38.6
18.8	12.6	46.2
17.4	33.6	39
25.4	39.4	38.8
15.2	24.6	20
22.6	27	44.8
17.6	28.2	55.6
24.2	29.6	31.8
15.6	30.8	31.4
19.2	47	52.6
23.4	35.8	40.4
21.8		31
21.2		25.4
28.4		27
19.8		34.6
25.6		32.2
22.8		30
21.4		25
19.8		30
		34
		28

## Sheet: Fig 3B
Figure 3B
Mean sleep per day (min)
		inc[2]; tub-QS/+; nsyb-Gal4QF/+
Control (BL5905 w[1118])	inc[2]	Vehicle	Pulse (3rd instar larval to pupal)
909.4	962	609.2	878.8
937.2	601	489	382.6
765.4	540.8	474.8	926
1016.8	302.4	466.4	1100.6
898.4	772	660.6	928
1020	727.6	257.6	1061.6
1083.6	596.8	503.4	791.6
900.8	709.8	601.2	800.2
780	617.2	767.4	342.6
770.8	828.4	306.4	897.8
992.4	341	599.6	788.4
891	808.4	530.4	900.2
976.2	784.4	361.4	914.6
926.4	884.2	571.4	1119
1005.2	444.4	1036.6	1152
1033.4	950.2	360.2	828.6
954.8	842.6	717.8	1255.8
1080.6	681.6	555	991
981.4	762.2	936.2	783.2
984.6	257.2	1108.4	654
922	749.4		965.6
1177	783.8		1116.2
1008	489.8		906.2
980.8	799		1013
1010.2	591.8		428.2
1085.8	637.4		1113.2
1126.8	519.2		793.2
855	470.4		1031.2
976	917.6		1081
1019.6	658.6
940.8	566.2
823.2	532.6
947.4	463.2
1029.4	627.2
922.8	398.8
1018.6	677.4
990.8	579.2
1111.6	601
1049.8	869.2
1174.8	514.6
1174.2	588.2
1071.4	754.6
918.6
1220.4
1130.2
982.2
1167
1035.6
1087.4
1011.4
887.4
1128.6
1022.6
1215.4
1023.2
1012.4
1031.2
1041.2
1067.2
1118.8
895
1180.2
1072.4
974.4
1151
1240.6
1170
1096.2
1059.4
1133.6
979.6
1091.2
1165.6
1025.8
990.8
1118
1094.8
938
985.2
1143.8
1076.8
1060.4
1065.2

## Sheet: Fig 3C
Figure 3C
Mean +/- SEM sleep (min/hr)
	Control (BL5905 w[1118])		inc[2]; tub-QS/+; nsyb-Gal4QF/+
			Vehicle		Pulse (3rd instar larval to pupal)
ZT	Mean	SEM	Mean	SEM	Mean	SEM
0 - 1	2.9	0.4	5.5	1.1	8.1	1.5
1 - 2	16.9	1.5	18.4	2.3	22.3	2.5
2 - 3	36.3	1.9	31.5	2.5	37.8	2.6
3 - 4	47.1	1.5	37	1.9	44.6	2.5
4 - 5	52.1	1	39.7	1.9	44.7	2.3
5 - 6	54.3	0.8	37.1	1.9	45.1	2.1
6 - 7	53.6	0.9	33.4	2.6	42.9	2.3
7 - 8	52.9	0.7	26.9	2.7	36.7	2.5
8 - 9	50.6	0.8	21.6	2.6	31.8	2.1
9 - 10	44.3	0.9	16.5	2.5	26	2.1
10 - 11	25.4	1.3	12.2	2.4	18.2	2
11 - 12	7.8	1.1	6.1	1.6	10.2	1.7
12 - 13	21.1	1.5	21.1	3.8	41.4	2.4
13 - 14	52.1	1	33.4	3.5	53.3	1.6
14 - 15	57.3	0.4	34.9	3.3	53	1.4
15 - 16	56.6	0.4	28.7	3.3	49.1	2
16 - 17	55.2	0.5	26.5	3.4	45.1	2
17 - 18	55.1	0.5	24.3	3.1	43.6	2.5
18 - 19	55.5	0.4	24.8	3	41.9	2.3
19 - 20	54.7	0.5	28.7	2.5	42.7	2.1
20 - 21	53.9	0.5	28.1	2.6	44.6	2
21 - 22	48.2	1	24.6	2.9	41	2.2
22 - 23	40.9	1.3	19.2	2.8	36.4	2
23 - 24	31	1.5	15.5	3	34.1	2.2

## Sheet: Fig 3D
Figure 3D
Mean sleep per day (min)
tub-QS/UAS-inc-RNAi; nsyb-Gal4QF/UAS-dcr2
Vehicle	Pulse (3rd instar larval to pupal)
1194	1100.8
1114.4	1040.6
1012.6	939.6
1079.2	951.8
1117.8	1097.2
1207.2	830.4
1062.8	1037.2
1074.6	908.6
1029.6	967.6
1068	1079.6
1095.2	957.6
1263.8	871.8
1130	847.6
1184.8	938.2
1158.2	969.8
1153.8	1046.6
	1111.8
	1002.6
	959.8
	958.8
	1145.2
	926.4
	670.2
	1020.4

## Sheet: Fig 3E
Figure 3E
Mean +/- SEM sleep (min/hr)
	tub-QS/UAS-inc-RNAi; nsyb-Gal4QF/UAS-dcr2
	Vehicle		Pulse (3rd instar larval to pupal)
ZT	Mean	SEM	Mean	SEM
0 - 1	10.3	1.5	8.1	1.5
1 - 2	27.3	1.6	22.3	2.5
2 - 3	42.5	1.1	37.8	2.6
3 - 4	45.3	1.3	44.6	2.5
4 - 5	47.3	1.3	44.7	2.3
5 - 6	45.8	1.4	45.1	2.1
6 - 7	40.6	2	42.9	2.3
7 - 8	29.7	1.9	36.7	2.5
8 - 9	23.1	2.3	31.8	2.1
9 - 10	18.4	2	26	2.1
10 - 11	13.7	2.2	18.2	2
11 - 12	8.7	2	10.2	1.7
12 - 13	11.9	3.2	41.4	2.4
13 - 14	19.7	2.8	53.3	1.6
14 - 15	22.9	2.5	53	1.4
15 - 16	23.3	2.4	49.1	2
16 - 17	23.3	2.1	45.1	2
17 - 18	23.4	2	43.6	2.5
18 - 19	24.9	2.4	41.9	2.3
19 - 20	28.6	2.5	42.7	2.1
20 - 21	30.4	2	44.6	2
21 - 22	24.4	2.1	41	2.2
22 - 23	19.2	1.9	36.4	2
23 - 24	14.5	1.9	34.1	2.2

## Sheet: Fig 3–S1
Figure 3–Figure supplement 1
Panel A: Mean nighttime sleep per day (min)
		inc[2]; tub-QS/+; nsyb-Gal4QF/+
Control (BL5905 w[1118])	inc[2]	Vehicle	Pulse (3rd instar larval to pupal)
607	520.2	334.4	540
555.6	277.2	301.6	214.6
451.4	285.8	282.8	557.8
609	114.8	311.2	580.8
566.4	418.2	282	550
597.2	376.4	101.6	639
699.6	231.6	259.2	467.6
495.8	257	299.8	494
530.8	241	425	316.2
469.8	477	116.4	524.8
648.6	124.4	317	533.4
672	371	309.2	583.6
602.8	407	97.4	619.4
585.6	487.6	265.6	675.8
609.4	147	553.4	675.4
624	528.4	163.4	514.6
555.6	462.8	457	713
618.2	359.4	294	606
551	382.8	476.2	526.6
528.6	49.6	676	408.4
525	544.4		558.4
609	342.4		586.4
565.4	175.2		423.6
596.4	426.2		577
620.8	308.4		253.2
657	284.8		642.8
652.2	179.4		508.6
488.4	179.8		601
585.2	475.2		595.8
599.4	229.2
623.8	237.6
559.8	281.6
592.4	197
639.2	270.2
590.4	118.2
635.4	301.4
574.6	294.8
668	206.2
633.6	393
676.2	189.2
706.2	262.6
623.6	407.8
533.6
660.4
630.4
628
678.6
585.4
641
645.6
438.8
626
554.4
640.8
570.4
515.2
575.6
572.2
581
610
418.6
660.6
610.8
581.2
610
676
648.8
590.8
582.6
580.6
572.2
593.2
637
521.4
521
608.4
600
454
531.4
654.4
570.2
614.6
585
Panel B: Mean daytime sleep per day (min)
		inc[2]; tub-QS/+; nsyb-Gal4QF/+
Control (BL5905 w[1118])	inc[2]	Vehicle	Pulse (3rd instar larval to pupal)
302.4	441.8	274.8	338.8
381.6	323.8	187.4	168
314	255	192	368.2
407.8	187.6	155.2	519.8
332	353.8	378.6	378
422.8	351.2	156	422.6
384	365.2	244.2	324
405	452.8	301.4	306.2
249.2	376.2	342.4	26.4
301	351.4	190	373
343.8	216.6	282.6	255
219	437.4	221.2	316.6
373.4	377.4	264	295.2
340.8	396.6	305.8	443.2
395.8	297.4	483.2	476.6
409.4	421.8	196.8	314
399.2	379.8	260.8	542.8
462.4	322.2	261	385
430.4	379.4	460	256.6
456	207.6	432.4	245.6
397	205		407.2
568	441.4		529.8
442.6	314.6		482.6
384.4	372.8		436
389.4	283.4		175
428.8	352.6		470.4
474.6	339.8		284.6
366.6	290.6		430.2
390.8	442.4		485.2
420.2	429.4
317	328.6
263.4	251
355	266.2
390.2	357
332.4	280.6
383.2	376
416.2	284.4
443.6	394.8
416.2	476.2
498.6	325.4
468	325.6
447.8	346.8
385
560
499.8
354.2
488.4
450.2
446.4
365.8
448.6
502.6
468.2
574.6
452.8
497.2
455.6
469
486.2
508.8
476.4
519.6
461.6
393.2
541
564.6
521.2
505.4
476.8
553
407.4
498
528.6
504.4
469.8
509.6
494.8
484
453.8
489.4
506.6
445.8
480.2
Panel C: Mean sleep bout length (min)
		inc[2]; tub-QS/+; nsyb-Gal4QF/+
Control (BL5905 w[1118])	inc[2]	Vehicle	Pulse (3rd instar larval to pupal)
23.44	19.16	11.08	20.25
25.61	14.04	9.33	9.71
14.83	11.22	8.39	32.38
28.24	8.89	10.27	24.9
19.7	11.84	10.1	14.82
26.98	12.63	10.22	24.8
36.36	12.7	9.72	23.28
26.97	17.66	11.01	16.07
21.91	13.42	15.53	13.08
16.9	21.46	9.52	23.75
28.52	12.63	11.02	16.56
29.12	11.85	9.51	17.65
34.13	15.44	8.4	24.07
21.64	18.81	10.9	32.34
52.91	15.65	22.34	23.32
33.12	26.39	9.95	16.18
25.39	16.52	17.95	56.06
50.5	19.04	10.32	28.98
43.81	13.23	21.87	19.2
32.18	9.97	26.52	12.39
35.19	24.81		25.02
72.65	14.3		34.66
29.3	10.84		20.32
24.28	22.19		30.33
31.18	13.45		12.16
33.51	14.29		37.61
58.69	14.26		18.8
23.11	15.68		32.63
35.88	20.12		44.67
42.13	10.26
29.04	12.81
18.62	12.8
23.57	11.58
25.86	16.42
27.96	10.72
24.97	10.72
36.97	19.7
66.17	11.09
53.02	16.72
97.9	11.04
143.2	12.9
39.98	15.15
45.93
66.33
53.82
34.83
36.7
31.96
36.01
20.9
60.78
41.49
47.79
49.81
39.97
61.73
58.59
41.65
55.58
67.4
34.69
92.2
71.49
30.64
65.4
108.82
80.14
53.21
54.61
65.91
41.86
53.49
89.66
74.33
48.57
71.67
38.55
51.54
51.85
71.49
57.28
44.18
70.08
Panel D: Mean sleep bout number (per day)
		inc[2]; tub-QS/+; nsyb-Gal4QF/+
Control (BL5905 w[1118])	inc[2]	Vehicle	Pulse (3rd instar larval to pupal)
38.8	50.2	55	43.4
36.6	42.8	52.4	39.4
51.6	48.2	56.6	28.6
36	34	45.4	44.2
45.6	65.2	65.4	62.6
37.8	57.6	25.2	42.8
29.8	47	51.8	34
33.4	40.2	54.6	49.8
35.6	46	49.4	26.2
45.6	38.6	32.2	37.8
34.8	27	54.4	47.6
30.6	68.2	55.8	51
28.6	50.8	43	38
42.8	47	52.4	34.6
19	28.4	46.4	49.4
31.2	36	36.2	51.2
37.6	51	40	22.4
21.4	35.8	53.8	34.2
22.4	57.6	42.8	40.8
30.6	25.8	41.8	52.8
26.2	30.2		38.6
16.2	54.8		32.2
34.4	45.2		44.6
40.4	36		33.4
32.4	44		35.2
32.4	44.6		29.6
19.2	36.4		42.2
37	30		31.6
27.2	45.6		24.2
24.2	64.2
32.4	44.2
44.2	41.6
40.2	40
39.8	38.2
33	37.2
40.8	63.2
26.8	29.4
16.8	54.2
19.8	52
12	46.6
8.2	45.6
26.8	49.8
20
18.4
21
28.2
31.8
32.4
30.2
48.4
14.6
27.2
21.4
24.4
25.6
16.4
17.6
25
19.2
16.6
25.8
12.8
15
31.8
17.6
11.4
14.6
20.6
19.4
17.2
23.4
20.4
13
13.8
20.4
15.6
28.4
18.2
19
16
18.8
24
15.2

## Sheet: Fig 3–S2
Figure 3–Figure supplement 2
Panel A: Mean nighttime sleep per day (min)
tub-QS/UAS-inc-RNAi; nsyb-Gal4QF/UAS-dcr2
Vehicle	Pulse (3rd instar larval to pupal)
632	660.4
599.4	637.8
514.8	563
584.2	569.4
613	619.2
628.2	535
583.2	667.4
563	542.6
562.8	565.8
559.8	613
572.8	579.2
671	560.2
615.8	514.6
631.2	599
629.8	564.6
650.4	647.6
	612.8
	599.8
	580.8
	625.6
	666
	588.8
	422.4
	585.6
Panel B: Mean daytime sleep per day (min)
tub-QS/UAS-inc-RNAi; nsyb-Gal4QF/UAS-dcr2
Vehicle	Pulse (3rd instar larval to pupal)
562	440.4
515	402.8
497.8	376.6
495	382.4
504.8	478
579	295.4
479.6	369.8
511.6	366
466.8	401.8
508.2	466.6
522.4	378.4
592.8	311.6
514.2	333
553.6	339.2
528.4	405.2
503.4	399
	499
	402.8
	379
	333.2
	479.2
	337.6
	247.8
	434.8
Panel C: Mean sleep bout length (min)
tub-QS/UAS-inc-RNAi; nsyb-Gal4QF/UAS-dcr2
Vehicle	Pulse (3rd instar larval to pupal)
78.55	66.31
55.72	50.51
52.74	32.62
62.02	48.56
62.1	55.98
94.31	32.95
67.27	42.51
62.48	29.89
58.5	34.56
59.33	67.47
76.06	31.5
150.45	41.91
62.09	26.49
92.56	31.27
107.24	26.94
73.96	50.81
	56.15
	46.85
	30.76
	23.62
	59.03
	31.94
	16.67
	43.24
Panel D: Mean sleep bout number (per day)
tub-QS/UAS-inc-RNAi; nsyb-Gal4QF/UAS-dcr2
Vehicle	Pulse (3rd instar larval to pupal)
15.2	16.6
20	20.6
19.2	28.8
17.4	19.6
18	19.6
12.8	25.2
15.8	24.4
17.2	30.4
17.6	28
18	16
14.4	30.4
8.4	20.8
18.2	32
12.8	30
10.8	36
15.6	20.6
	19.8
	21.4
	31.2
	40.6
	19.4
	29
	40.2
	23.6

## Sheet: Fig 4A
Figure 4A
Mean sleep per day (min)
Genotype	Sleep (min / day)
inc[2]; c253-Gal4	829.56
inc[2]; nsyb-Gal4	813.42
inc[2]; P{GMR55A03-GAL4}attP2	760.75
inc[2]; P{GMR32E04-GAL4}attP2	751.48
inc[2]; P{GMR14E12-GAL4}attP2	734.24
inc[2]; c309-Gal4	719
inc[2]; P{GMR65B09-GAL4}attP2	718.96
inc[2]; P{GMR10E06-GAL4}attP2	716.05
inc[2]; P{GMR24C07-GAL4}attP2	712.57
inc[2]; P{GMR65D06-GAL4}attP2	711.23
inc[2]; P{GMR59H01-GAL4}attP2	709.46
inc[2]; P{GMR80C12-GAL4}attP2	708.83
inc[2]; P{GMR20D07-GAL4}attP2	708.5
inc[2]; P{GMR71D01-GAL4}attP2	702.46
inc[2]; P{GMR47D07-GAL4}attP2	689.76
inc[2]; P{GMR74H01-GAL4}attP2	689.1
inc[2]; P{GMR19C10-GAL4}attP2	688.17
inc[2]; P{GMR81C04-GAL4}attP2	678.54
inc[2]; P{GMR60H12-GAL4}attP2	677.62
inc[2]; P{GMR28F06-GAL4}attP2	676.21
inc[2]; P{GMR39C07-GAL4}attP2	674.14
inc[2]; P{GMR89C02-GAL4}attP2	670.52
inc[2]; P{GMR49F02-GAL4}attP2	668.75
inc[2]; P{GMR60D05-GAL4}attP2	668.42
inc[2]; P{GMR11C07-GAL4}attP2	667.8
inc[2]; P{GMR53G07-GAL4}attP2	666.38
inc[2]; P{GMR10E07-GAL4}attP2	654.9
inc[2]; P{GMR14E06-GAL4}attP2	652.21
inc[2]; P{GMR59C12-GAL4}attP2	651.76
inc[2]; P{GMR34F06-GAL4}attP2	651.12
inc[2]; P{GMR45D05-GAL4}attP2	637.83
inc[2]; P{GMR14E09-GAL4}attP2	630.71
inc[2]; P{GMR17B12-GAL4}attP2	627.79
inc[2]; P{GMR11E05-GAL4}attP2	625.62
inc[2]; P{GMR44D02-GAL4}attP2	621.11
inc[2]; P{GMR79B08-GAL4}attP2	620.42
inc[2]; P{GMR95F03-GAL4}attP2	619.9
inc[2]; P{GMR26B04-GAL4}attP2	617.52
inc[2]; P{GMR47G08-GAL4}attP2	617.17
inc[2]; P{GMR13B10-GAL4}attP2	616.95
inc[2]; P{GMR38A11-GAL4}attP2	614.86
inc[2]; P{GMR38E08-GAL4}attP2	614
inc[2]; P{GMR48A03-GAL4}attP2	613.83
inc[2]; P{GMR34C12-GAL4}attP2	609.67
inc[2]; P{GMR10H09-GAL4}attP2	609.56
inc[2]; P{GMR85C07-GAL4}attP2	609.29
inc[2]; P{GMR28E01-GAL4}attP2	609
inc[2]; P{GMR34B11-GAL4}attP2	608.38
inc[2]; P{GMR34C08-GAL4}attP2	600.96
inc[2]; P{GMR48G04-GAL4}attP2	600.86
inc[2]; NP1227-GAL4	599.38
inc[2]; P{GMR81D04-GAL4}attP2	598.52
inc[2]; P{GMR49A09-GAL4}attP2	598.43
inc[2]; P{GMR12G09-GAL4}attP2	598.05
inc[2]; P{GMR49F01-GAL4}attP2	595
inc[2]; P{GMR93G11-GAL4}attP2	592.13
inc[2]; P{GMR64A11-GAL4}attP2	591.81
inc[2]; P{GMR93B04-GAL4}attP2	591.58
inc[2]; P{GMR17D02-GAL4}attP2	590.88
inc[2]; P{GMR66A03-GAL4}attP2	590.67
inc[2]; P{GMR29A12-GAL4}attP2	588.71
inc[2]; P{GMR59H05-GAL4}attP2	588.12
inc[2]; P{GMR43D09-GAL4}attP2	584.81
inc[2]; P{GMR77A04-GAL4}attP2	581.54
inc[2]; P{GMR14E05-GAL4}attP2	581.17
inc[2]; P{GMR64D08-GAL4}attP2	580.42
inc[2]; P{GMR87C01-GAL4}attP2	575.25
inc[2]; P{GMR46B05-GAL4}attP2	574.5
inc[2]; P{GMR13F04-GAL4}attP2	572.9
inc[2]; P{GMR37F05-GAL4}attP2	572.29
inc[2]; P{GMR24F03-GAL4}attP2	570.96
inc[2]; P{GMR65H10-GAL4}attP2	569.29
inc[2]; P{GMR65B04-GAL4}attP2	567.67
inc[2]; P{GMR12D12-GAL4}attP2	566.48
inc[2]; P{GMR14H02-GAL4}attP2	566.33
inc[2]; P{GMR59B10-GAL4}attP2	564.71
inc[2]; P{GMR26B11-GAL4}attP2	563.71
inc[2]; P{GMR25H06-GAL4}attP2	553.96
inc[2]; P{GMR94H10-GAL4}attP2	552.29
inc[2]; P{GMR74B11-GAL4}attP2	550.9
inc[2]; P{GMR48A08-GAL4}attP2	546.07
inc[2]; P{GMR13E04-GAL4}attP2	545.17
inc[2]; P{GMR91A08-GAL4}attP2	544.79
inc[2]; P{GMR64G05-GAL4}attP2	541.58
inc[2]; P{GMR71E04-GAL4}attP2	538.38
inc[2]; P{GMR93C08-GAL4}attP2	536.42
inc[2]; P{GMR94D04-GAL4}attP2	535.12
inc[2]; P{GMR31G04-GAL4}attP2	534.42
inc[2]; P{GMR14G08-GAL4}attP2	533.38
inc[2]; P{GMR40C07-GAL4}attP2	532.21
inc[2]; P{GMR16H05-GAL4}attP2	531.43
inc[2]; P{GMR24H03-GAL4}attP2	529.52
inc[2]; P{GMR14B11-GAL4}attP2	525.54
inc[2]; P{GMR55G02-GAL4}attP2	525.17
inc[2]; P{GMR59A05-GAL4}attP2	523.14
inc[2]; P{GMR12B10-GAL4}attP2	521.17
inc[2]; P{GMR45G05-GAL4}attP2	520.42
inc[2]; P{GMR70A09-GAL4}attP2	516.71
inc[2]; P{GMR26C01-GAL4}attP2	516.54
inc[2]; P{GMR14F11-GAL4}attP2	516.17
inc[2]; P{GMR45D10-GAL4}attP2	511.93
inc[2]; P{GMR25C01-GAL4}attP2	508.71
inc[2]; P{GMR92H11-GAL4}attP2	507.29
inc[2]; P{GMR26E07-GAL4}attP2	506.03
inc[2]; P{GMR45H11-GAL4}attP2	505.17
inc[2]; P{GMR87B02-GAL4}attP2	505.11
inc[2]; P{GMR53C04-GAL4}attP2	504.12
inc[2]; P{GMR22E06-GAL4}attP2	503.43
inc[2]; P{GMR21C09-GAL4}attP2	500.71
inc[2]; P{GMR83H01-GAL4}attP2	500.48
inc[2]; P{GMR23F05-GAL4}attP2	500.29
inc[2]; P{GMR24C10-GAL4}attP2	499.83
inc[2]; P{GMR31F06-GAL4}attP2	498.52
inc[2]	497.14
inc[2]; P{GMR23B04-GAL4}attP2	496.58
inc[2]; P{GMR73H09-GAL4}attP2	495.71
inc[2]; P{GMR18G02-GAL4}attP2	495.67
inc[2]; P{GMR79A01-GAL4}attP2	491.57
inc[2]; P{GMR60D10-GAL4}attP2	491.57
inc[2]; P{GMR52C05-GAL4}attP2	488.17
inc[2]; P{GMR92A08-GAL4}attP2	486.24
inc[2]; P{GMR20F04-GAL4}attP2	482.75
inc[2]; P{GMR18D04-GAL4}attP2	482.25
inc[2]; P{GMR44G12-GAL4}attP2	481.87
inc[2]; P{GMR14C08-GAL4}attP2	481.25
inc[2]; P{GMR48H11-GAL4}attP2	479.22
inc[2]; P{GMR92G09-GAL4}attP2	477.96
inc[2]; P{GMR65C05-GAL4}attP2	477.87
inc[2]; P{GMR54F06-GAL4}attP2	473.5
inc[2]; P{GMR21D02-GAL4}attP2	473.42
inc[2]; P{GMR56F05-GAL4}attP2	473.17
inc[2]; P{GMR53B06-GAL4}attP2	473
inc[2]; P{GMR15D11-GAL4}attP2	468.96
inc[2]; P{GMR48H10-GAL4}attP2	465.33
inc[2]; VT64246-Gal4	464.67
inc[2]; P{GMR52F11-GAL4}attP2	462.96
inc[2]; P{GMR73D06-GAL4}attP2	462.52
inc[2]; P{GMR48E02-GAL4}attP2	462.25
inc[2]; P{GMR56H02-GAL4}attP2	461.1
inc[2]; P{GMR72A04-GAL4}attP2	460.43
inc[2]; P{GMR94F06-GAL4}attP2	458.83
inc[2]; P{GMR47F04-GAL4}attP2	456.05
inc[2]; P{GMR67B06-GAL4}attP2	455.38
inc[2]; P{GMR49C03-GAL4}attP2	453.12
inc[2]; P{GMR15E09-GAL4}attP2	450.58
inc[2]; P{GMR52A01-GAL4}attP2	450.17
inc[2]; P{GMR35H03-GAL4}attP2	448.67
inc[2]; P{GMR54H12-GAL4}attP2	448
inc[2]; P{GMR18F04-GAL4}attP2	447.04
inc[2]; P{GMR15B07-GAL4}attP2	446.46
inc[2]; P{GMR31H05-GAL4}attP2	446
inc[2]; P{GMR16D12-GAL4}attP2	444.54
inc[2]; P{GMR13D09-GAL4}attP2	443.88
inc[2]; P{GMR25E04-GAL4}attP2	441.9
inc[2]; P{GMR10D10-GAL4}attP2	441.24
inc[2]; P{GMR38B06-GAL4}attP2	441.19
inc[2]; P{GMR26F09-GAL4}attP2	439.38
inc[2]; P{GMR35B08-GAL4}attP2	438.43
inc[2]; P{GMR42E09-GAL4}attP2	437.44
inc[2]; c584-Gal4	434.11
inc[2]; c305a-Gal4	433.85
inc[2]; P{GMR51G05-GAL4}attP2	431.33
inc[2]; P{GMR72G06-GAL4}attP2	431.12
inc[2]; P{GMR55B12-GAL4}attP2	430.86
inc[2]; P{GMR10A12-GAL4}attP2	430.75
inc[2]; P{GMR33H07-GAL4}attP2	429.57
inc[2]; R2-split-Gal4	428.22
inc[2]; P{GMR51B08-GAL4}attP2	425.67
inc[2]; P{GMR65C03-GAL4}attP2	424.57
inc[2]; P{GMR47E07-GAL4}attP2	420.96
inc[2]; P{GMR19E12-GAL4}attP2	420.75
inc[2]; P{GMR30B10-GAL4}attP2	420.38
inc[2]; P{GMR44B03-GAL4}attP2	416.54
inc[2]; P{GMR26E02-GAL4}attP2	416.54
inc[2]; P{GMR24C06-GAL4}attP2	416.12
inc[2]; P{GMR50A07-GAL4}attP2	415.87
inc[2]; P{GMR59E04-GAL4}attP2	415.37
inc[2]; P{GMR48B10-GAL4}attP2	411.83
inc[2]; P{GMR30G03-GAL4}attP2	411.81
inc[2]; P{GMR94E07-GAL4}attP2	411.54
inc[2]; P{GMR58E10-GAL4}attP2	411.25
inc[2]; P{GMR55D01-GAL4}attP2	409.04
inc[2]; P{GMR70G11-GAL4}attP2	407.71
inc[2]; P{GMR33H11-GAL4}attP2	405.25
inc[2]; P{GMR74G04-GAL4}attP2	404
inc[2]; P{GMR48C06-GAL4}attP2	402.29
inc[2]; P{GMR18D07-GAL4}attP2	401.33
inc[2]; P{GMR45G01-GAL4}attP2	401.17
inc[2]; P{GMR72H03-GAL4}attP2	394.75
inc[2]; P{GMR49G06-GAL4}attP2	391.21
inc[2]; P{GMR60G12-GAL4}attP2	391
inc[2]; P{GMR32D08-GAL4}attP2	390.83
inc[2]; P{GMR10A11-GAL4}attP2	390.4
inc[2]; P{GMR21H06-GAL4}attP2	390.14
inc[2]; P{GMR48H04-GAL4}attP2	389.9
inc[2]; P{GMR13E06-GAL4}attP2	387.33
inc[2]; NP2721-Gal4	386.04
inc[2]; P{GMR24E05-GAL4}attP2	383.71
inc[2]; P{GMR93C06-GAL4}attP2	383.29
inc[2]; P{GMR55D05-GAL4}attP2	382.83
inc[2]; P{GMR24A08-GAL4}attP2	382.79
inc[2]; P{GMR26C11-GAL4}attP2	380.88
inc[2]; P{GMR10G02-GAL4}attP2	380.48
inc[2]; P{GMR23E10-GAL4}attP2	379.67
inc[2]; P{GMR48G01-GAL4}attP2	379.42
inc[2]; P{GMR35D07-GAL4}attP2	376.62
inc[2]; P{GMR49E09-GAL4}attP2	376.52
inc[2]; P{GMR19F05-GAL4}attP2	375
inc[2]; P{GMR16E03-GAL4}attP2	374.29
inc[2]; P{GMR25A06-GAL4}attP2	372.54
inc[2]; P{GMR23C06-GAL4}attP2	371.13
inc[2]; P{GMR60F05-GAL4}attP2	369.04
inc[2]; P{GMR55F07-GAL4}attP2	368.11
inc[2]; P{GMR95E08-GAL4}attP2	367.95
inc[2]; P{GMR25G01-GAL4}attP2	364.83
inc[2]; P{GMR67A04-GAL4}attP2	364
inc[2]; P{GMR93D01-GAL4}attP2	363.58
inc[2]; P{GMR93G05-GAL4}attP2	358.08
inc[2]; P{GMR40E08-GAL4}attP2	358
inc[2]; P{GMR59E09-GAL4}attP2	357.95
inc[2]; P{GMR58G05-GAL4}attP2	357.95
inc[2]; P{GMR22F03-GAL4}attP2	353.86
inc[2]; P{GMR77H03-GAL4}attP2	353.85
inc[2]; P{GMR39E10-GAL4}attP2	350.81
inc[2]; P{GMR48D06-GAL4}attP2	348.94
inc[2]; P{GMR95F11-GAL4}attP2	346.95
inc[2]; P{GMR22C12-GAL4}attP2	345.42
inc[2]; P{GMR69C02-GAL4}attP2	344.95
inc[2]; P{GMR30F07-GAL4}attP2	338.67
inc[2]; P{GMR48D07-GAL4}attP2	336.88
inc[2]; P{GMR23G07-GAL4}attP2	336.6
inc[2]; P{GMR55G11-GAL4}attP2	334
inc[2]; P{GMR17G05-GAL4}attP2	331.38
inc[2]; P{GMR35F09-GAL4}attP2	330.14
inc[2]; P{GMR65D07-GAL4}attP2	329.46
inc[2]; P{GMR20E08-GAL4}attP2	327.71
inc[2]; P{GMR42F06-GAL4}attP2	323.95
inc[2]; P{GMR58F01-GAL4}attP2	320.42
inc[2]; P{GMR56H09-GAL4}attP2	316.86
inc[2]; P{GMR47H01-GAL4}attP2	316.71
inc[2]; c929-Gal4	316.58
inc[2]; P{GMR41G11-GAL4}attP2	313.52
inc[2]; P{GMR20F01-GAL4}attP2	311.25
inc[2]; P{GMR64F03-GAL4}attP2	311.24
inc[2]; P{GMR19G10-GAL4}attP2	308.76
inc[2]; P{GMR46H09-GAL4}attP2	308.29
inc[2]; P{GMR25C03-GAL4}attP2	304.67
inc[2]; P{GMR58H05-GAL4}attP2	298.62
inc[2]; P{GMR60C01-GAL4}attP2	297.75
inc[2]; P{GMR13C06-GAL4}attP2	297.75
inc[2]; P{GMR10E03-GAL4}attP2	295.42
inc[2]; P{GMR39G09-GAL4}attP2	291.29
inc[2]; P{GMR78G06-GAL4}attP2	289.86
inc[2]; P{GMR25A01-GAL4}attP2	288.79
inc[2]; P{GMR21C11-GAL4}attP2	287.25
inc[2]; P{GMR18G06-GAL4}attP2	282.04
inc[2]; P{GMR44B10-GAL4}attP2	281.33
inc[2]; P{GMR15B03-GAL4}attP2	280
inc[2]; P{GMR87A08-GAL4}attP2	279.2
inc[2]; P{GMR65H08-GAL4}attP2	278.5
inc[2]; P{GMR26B12-GAL4}attP2	277.38
inc[2]; P{GMR24B11-GAL4}attP2	270.19
inc[2]; P{GMR76F06-GAL4}attP2	267.33
inc[2]; P{GMR22H10-GAL4}attP2	266.61
inc[2]; P{GMR69H02-GAL4}attP2	262.88
inc[2]; P{GMR40B09-GAL4}attP2	261.39
inc[2]; P{GMR93H07-GAL4}attP2	251.24
inc[2]; P{GMR93F02-GAL4}attP2	248.71
inc[2]; P{GMR52F09-GAL4}attP2	247.61
inc[2]; P{GMR27A02-GAL4}attP2	243.5
inc[2]; P{GMR93D06-GAL4}attP2	236.42
inc[2]; P{GMR69F08-GAL4}attP2	230.79
inc[2]; P{GMR21D06-GAL4}attP2	228.46
inc[2]; P{GMR72F10-GAL4}attP2	227.61
inc[2]; P{GMR91G01-GAL4}attP2	214.14
inc[2]; P{GMR42D11-GAL4}attP2	211.49
inc[2]; P{GMR20E01-GAL4}attP2	211.21
inc[2]; P{GMR78A01-GAL4}attP2	198.31
inc[2]; P{GMR37E08-GAL4}attP2	168.14

[truncated: 11 more sheets: Fig 4B, Fig 4C, Fig 4E, Fig 4F, Fig 4–S1, Fig 4-S2, Fig 5, Fig 5—S1, Fig 6, Fig 7, Fig 7–S2]
