# Supplementary material for: insomniac links the development and function of a sleep-regulatory circuit
Source: eLife journal article supplement (doi:10.7554/elife.65437), 2021-12-15
Supplement: supp [file elife_poa_e65437_Figure_2_figure_supplement_1.pdf › elife_poa_e65437_Figure_2_figure_supplement_1.pdf]

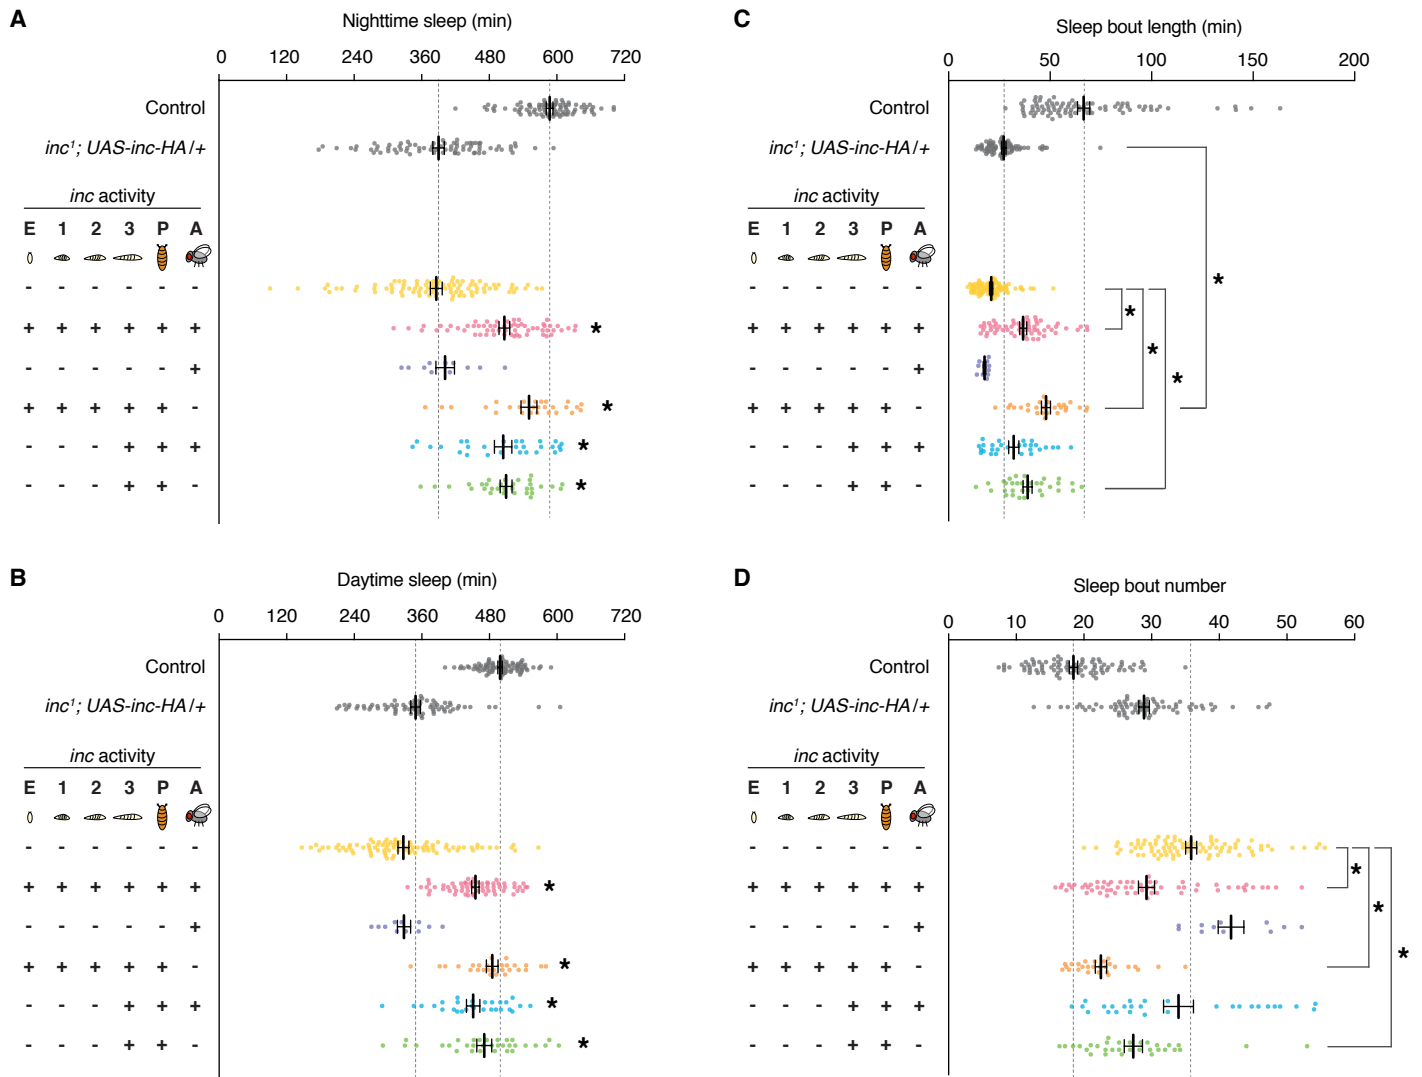

**Figure 2—Figure supplement 1. Additional sleep parameters for conditional rescue of *inc*<sup>1</sup> mutants using the Q-system.**

Sleep parameters for control (gray) and *inc*<sup>1</sup>; *UAS-inc-HA/tub-QS*; *nsyb-GAL4QF/+* animals exposed to quinic acid (+) or vehicle (-) at indicated life stages; embryos (E), larval stages (1-3), pupae (P), and adults (A). Bars represent mean  $\pm$  SEM.  $n = 11-86$  as in Figure 2B. (A) Nighttime sleep. One-way ANOVA ( $F(7,397) = 61.39$ ,  $p < 0.0001$ ) and Tukey post-hoc tests,  $*p < 0.01$  for comparisons to *inc*<sup>1</sup>; *UAS-inc-HA/+*. (B) Daytime sleep. One-way ANOVA ( $F(7,397) = 66.67$ ,  $p < 0.0001$ ) and Tukey post-hoc tests,  $*p < 0.01$  for comparisons to *inc*<sup>1</sup>; *UAS-inc-HA/+*. (C) Sleep bout length. Kruskal-Wallis ( $p < 0.0001$ ) and Dunn's tests,  $*p < 0.01$  compared to *inc*<sup>1</sup>; *UAS-inc-HA/+* and to vehicle-treated *inc*<sup>1</sup>; *UAS-inc-HA/tub-QS*; *nsyb-GAL4QF/+* animals. (D) Sleep bout number. One-way ANOVA ( $F(7,397) = 42.86$ ,  $p < 0.0001$ ) and Tukey post-hoc tests,  $*p < 0.01$ . Note that effects of Q-system induction on sleep bout number are compared to vehicle-treated *inc*<sup>1</sup>; *UAS-inc-HA/tub-QS*; *nsyb-GAL4QF/+* animals, which have significantly more sleep bouts than *inc*<sup>1</sup>; *UAS-inc-HA/+* animals ( $p < 0.01$ ).
