# Supplementary material for: insomniac links the development and function of a sleep-regulatory circuit
Source: eLife journal article supplement (doi:10.7554/elife.65437), 2021-12-15
Supplement: supp [file elife_poa_e65437_Figure_3_figure_supplement_1.pdf › elife_poa_e65437_Figure_3_figure_supplement_1.pdf]

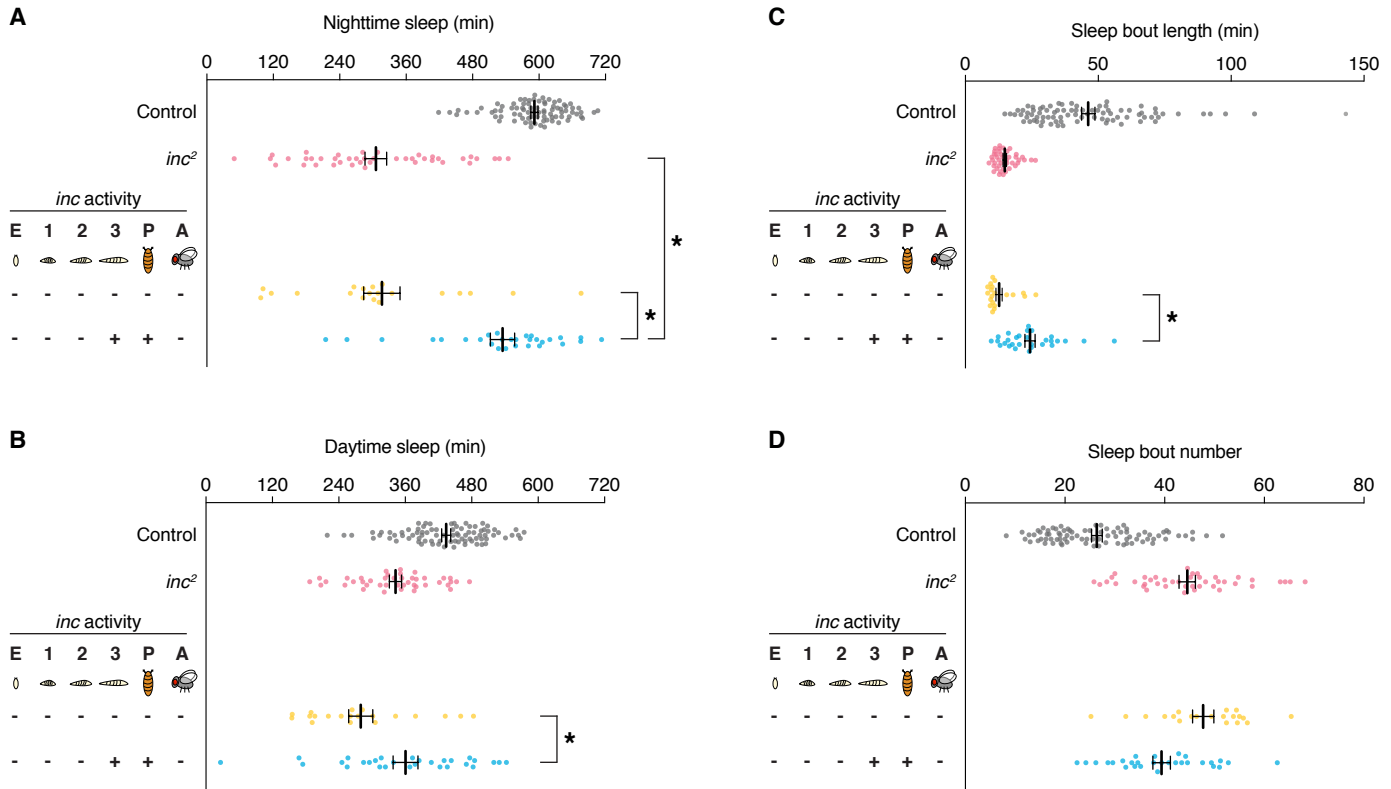

**Figure 3–Figure supplement 1. Additional sleep parameters for conditional *inc*<sup>2</sup> rescue in 3rd instar larval and pupal neurons.**

Sleep parameters for control, *inc*<sup>2</sup>, and *inc*<sup>2</sup>; *tub-QS/+*; *nsyb-Gal4QF/+* animals exposed to vehicle or quinic acid at 3rd instar larval and pupal stages. Bars represent mean  $\pm$  SEM. Data are shown for the same animals in Figures 3B and 3C. *n* = 20–83. **(A)** Nighttime sleep. One way ANOVA ( $F(3, 170) = 95.85$ ,  $p < 0.0001$ ) and Tukey post-hoc tests, \*  $p < 0.01$ . **(B)** Daytime sleep, One way ANOVA ( $F(3, 170) = 23.10$ ,  $p < 0.0001$ ) and Tukey post-hoc tests, \*  $p < 0.01$ . **(C)** Sleep bout length. Kruskal-Wallis ( $p < 0.0001$ ) and Dunn's post hoc tests, \*  $p < 0.01$ . **(D)** Sleep bout number ( $F(3, 170) = 46.14$ ,  $p < 0.0001$ ).
