# Supplementary material for: insomniac links the development and function of a sleep-regulatory circuit
Source: eLife journal article supplement (doi:10.7554/elife.65437), 2021-12-15
Supplement: supp [file elife_poa_e65437_Figure_3_figure_supplement_2.pdf › elife_poa_e65437_Figure_3_figure_supplement_2.pdf]

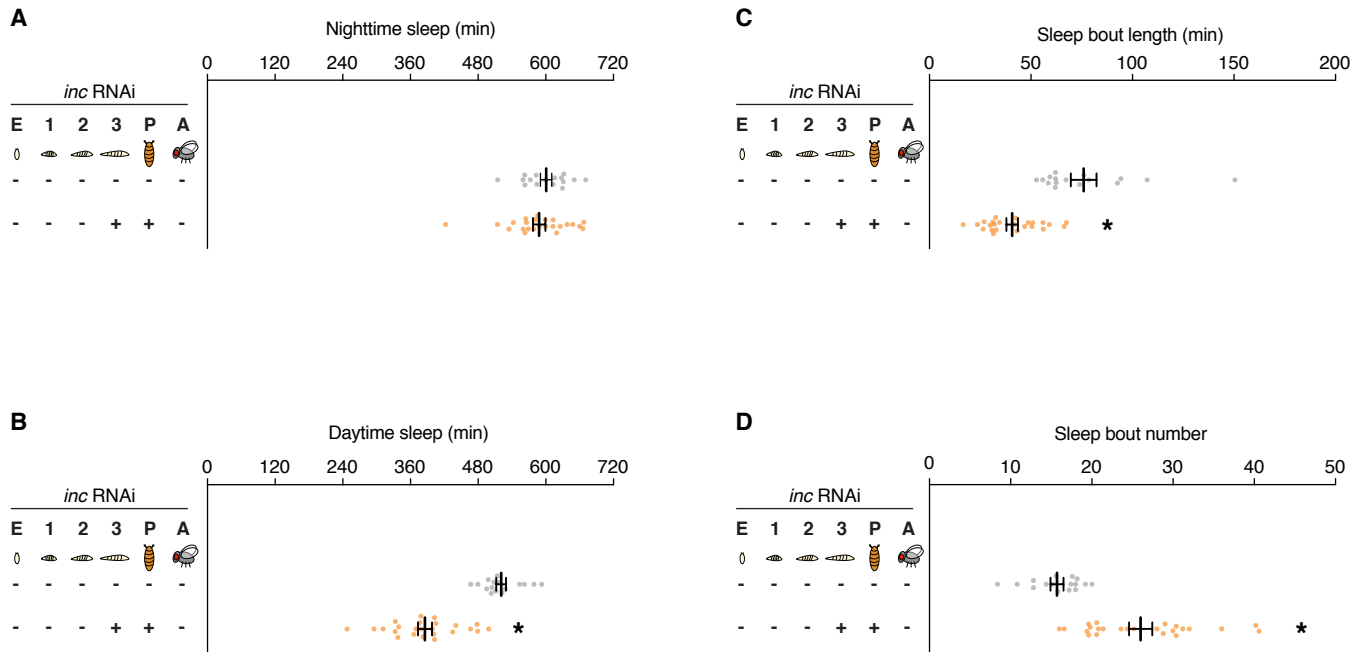

**Figure 3–Figure supplement 2. Additional sleep parameters for conditional *inc* RNAi in larval and pupal neurons.**

Sleep parameters for *tub-QS/UAS-inc-RNAi; nsyb-Gal4QF/UAS-dcr2* animals exposed to vehicle or quinic acid in late 3rd instar larval and pupal neurons. (A) Nighttime sleep. (B) Daytime sleep. (C) Sleep bout length. (D) Sleep bout number. Bars represent mean  $\pm$  SEM.  $n = 16$ – $24$  as in Figures 3D and 3E. \* $p < 0.01$  for comparison to vehicle-treated controls using Student's t-tests (A, B, and D) or Mann-Whitney test (C).
