# Supplementary material for: insomniac links the development and function of a sleep-regulatory circuit
Source: eLife journal article supplement (doi:10.7554/elife.65437), 2021-12-15
Supplement: supp [file elife_poa_e65437_Figure_4_figure_supplement_1.pdf › elife_poa_e65437_Figure_4_figure_supplement_1.pdf]

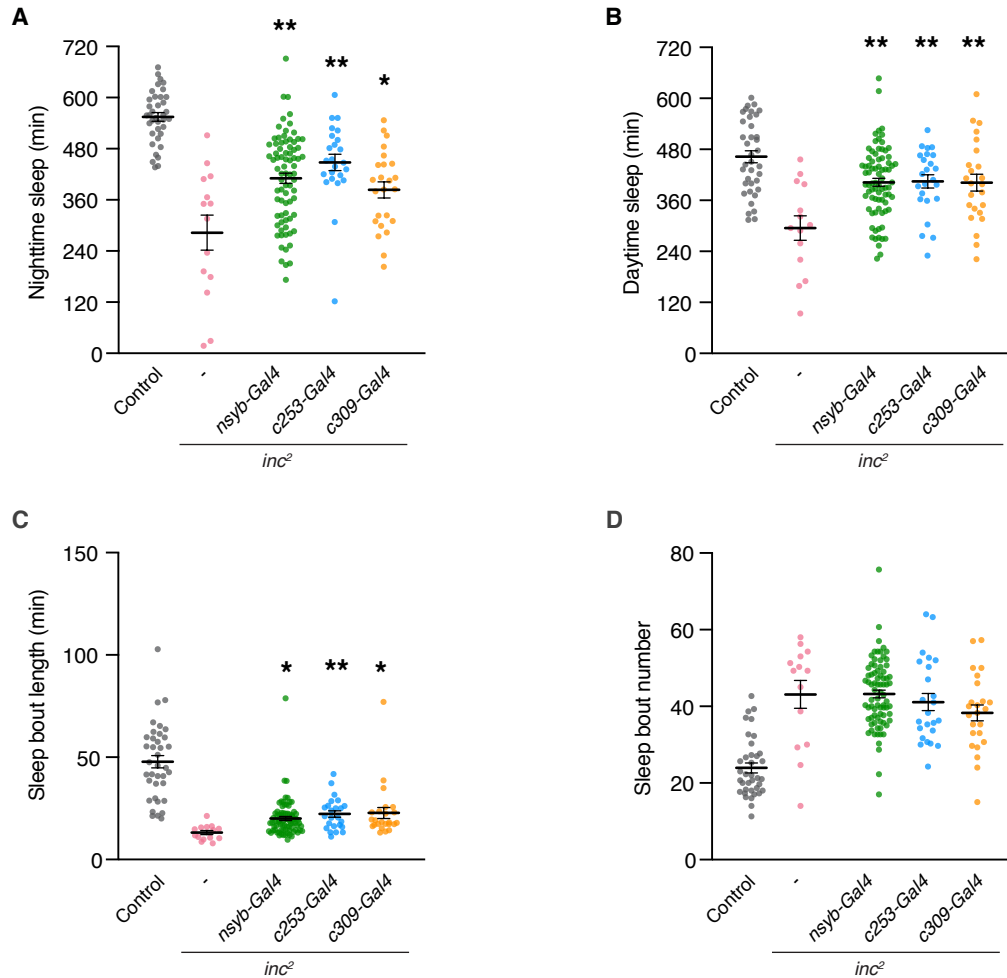

**Figure 4—Figure supplement 1. Rescue of *inc* sleep phenotypes by c253-Gal4 and c309-Gal4.**

For all panels, bars represent mean  $\pm$  SEM.  $n = 14$ – $78$  as in Figures 4B and 4C. \*\*  $p < 0.01$  and \*  $p < 0.05$  for post-hoc comparisons to *inc*<sup>2</sup>. (A) Nighttime sleep. One-way ANOVA ( $F(4, 172) = 24.57$ ,  $p < 0.0001$ ) and Tukey post-hoc tests. (B) Daytime sleep. One-way ANOVA ( $F(4, 172) = 9.664$ ,  $p < 0.0001$ ) and Tukey post-hoc tests. (C) Sleep bout length. Kruskal-Wallis ( $p < 0.0001$ ) and Dunn's post-hoc tests. (D) Sleep bout number. One-way ANOVA ( $F(4, 172) = 27.26$ ,  $p < 0.0001$ ) and Tukey post-hoc tests.
