# Supplementary material for: insomniac links the development and function of a sleep-regulatory circuit
Source: eLife journal article supplement (doi:10.7554/elife.65437), 2021-12-15
Supplement: supp [file elife_poa_e65437_Figure_4_figure_supplement_2.pdf › elife_poa_e65437_Figure_4_figure_supplement_2.pdf]

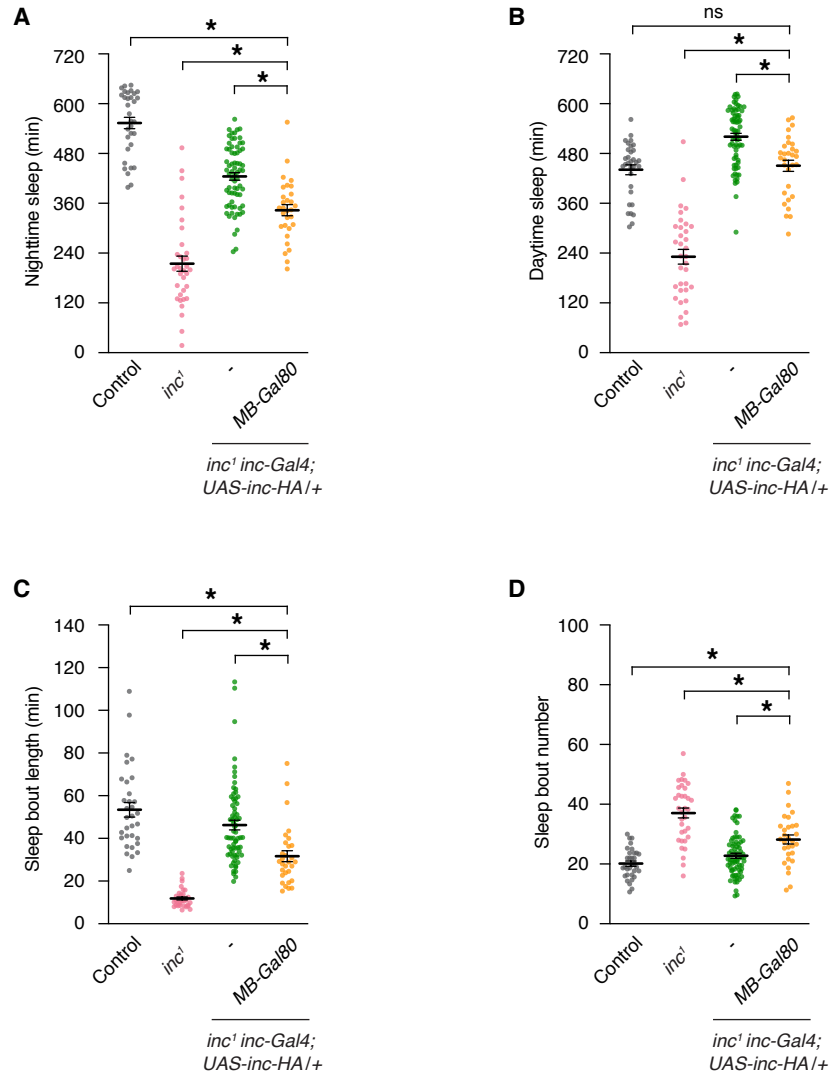

**Figure 4—Figure supplement 2. Additional parameters for suppression of sleep rescue in *inc<sup>1</sup> inc-Gal4; UAS-inc-HA* animals by *MB-Gal80*.**

(A) Nighttime sleep. One-way ANOVA ( $F(3, 161) = 99.03$ ,  $p < 0.0001$ ) and Tukey post-hoc tests, \*  $p < 0.01$ . (B) Daytime sleep. One-way ANOVA ( $F(3, 161) = 104.8$ ,  $p < 0.0001$ ) and Tukey post-hoc tests, \*  $p < 0.01$ . (C) Sleep bout length. Kruskal-Wallis ( $p < 0.0001$ ) and Dunn's post-hoc tests, \*  $p < 0.01$ . (D) Sleep bout number. One-way ANOVA ( $F(3, 161) = 36.26$ ,  $p < 0.0001$ ) and Tukey post-hoc tests, \*  $p < 0.01$ . For all panels,  $n = 30-69$  as in Figure 4E; bars represent mean  $\pm$  SEM. ns,  $p > 0.5$ .
