# Supplementary material for: insomniac links the development and function of a sleep-regulatory circuit
Source: eLife journal article supplement (doi:10.7554/elife.65437), 2021-12-15
Supplement: supp [file elife_poa_e65437_Figure_5_figure_supplement_1.pdf › elife_poa_e65437_Figure_5_figure_supplement_1.pdf]

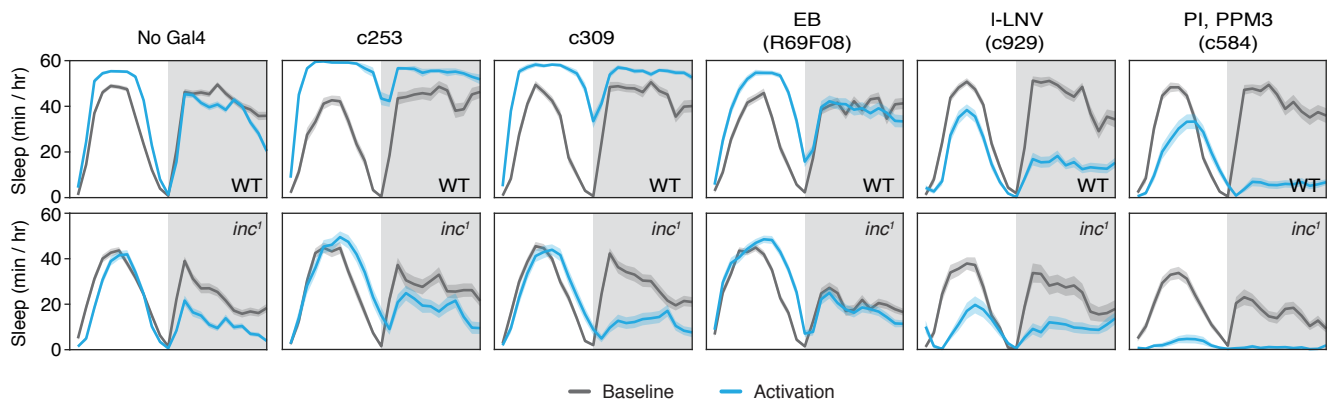

**Figure 5—Figure supplement 1. Sleep profiles during baseline and neuronal activation.**

Average sleep profiles of animals from Figure 5A on the baseline day and during thermogenetic activation. Shading represents  $\pm$  SEM. Note that control animals (No Gal4) are identical to those in Figure 5B.
