# Supplementary material for: insomniac links the development and function of a sleep-regulatory circuit
Source: eLife journal article supplement (doi:10.7554/elife.65437), 2021-12-15
Supplement: supp [file elife_poa_e65437_Figure_5_figure_supplement_2.pdf › elife_poa_e65437_Figure_5_figure_supplement_2.pdf]

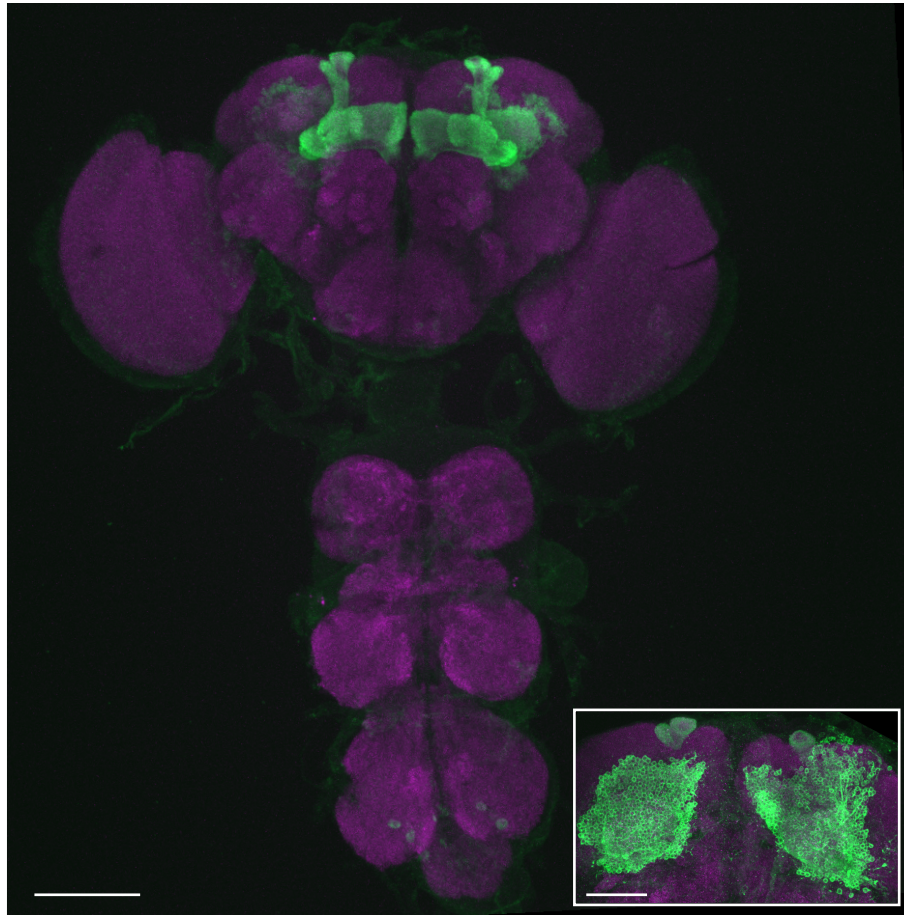

**Figure 5—Figure supplement 2. A split-Gal4 driver expressed specifically in MB neurons.**

Anti-GFP (green) and anti-Brp (magenta) staining is shown for maximal projections of adult brain and ventral nerve cord expressing *20×UAS-IVS-CD8-GFP* under the control of a mushroom body-specific split-Gal4 driver (MB004B). Inset shows maximal projections of a partial z-stack generated from posterior sections of a different brain, indicating broad expression in MB neuron somata. Scale bars, 100  $\mu\text{m}$  and 50  $\mu\text{m}$  (inset).
