# Supplementary material for: insomniac links the development and function of a sleep-regulatory circuit
Source: eLife journal article supplement (doi:10.7554/elife.65437), 2021-12-15
Supplement: supp [file elife_poa_e65437_Figure_7_figure_supplement_1.pdf › elife_poa_e65437_Figure_7_figure_supplement_1.pdf]

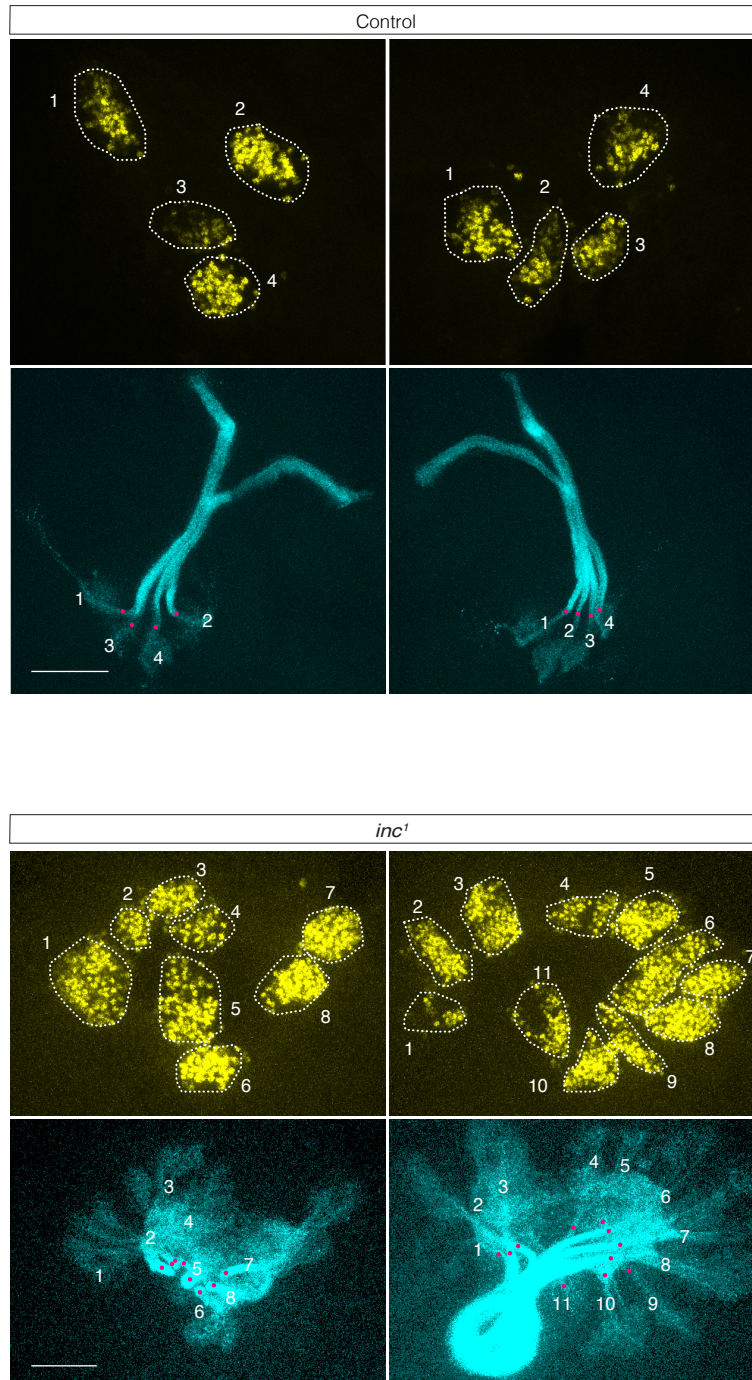

**Figure 7–Figure supplement 1. Analysis of  $\alpha/\beta_c$  neuron clusters and projections.**

High resolution maximal-projection images of control (top) and *inc¹* (bottom) brains expressing *UAS-MyrGFP-2A-RedStinger* in mushroom body  $\alpha/\beta_c$  neurons. Anti-dsRed (yellow) and anti-GFP (cyan) signal is shown for left and right hemispheres of single brains; the same brains are shown at lower resolution in Figure 7A. White dashed lines mark discrete neuron clusters enumerated in single-blind analysis (see Methods); magenta dots indicate distinct projection fascicles from analysis of image stacks. Scale bars, 30  $\mu\text{m}$ .
