# Supplementary material for: insomniac links the development and function of a sleep-regulatory circuit
Source: eLife journal article supplement (doi:10.7554/elife.65437), 2021-12-15
Supplement: supp [file elife_poa_e65437_Figure_7_figure_supplement_2.pdf › elife_poa_e65437_Figure_7_figure_supplement_2.pdf]

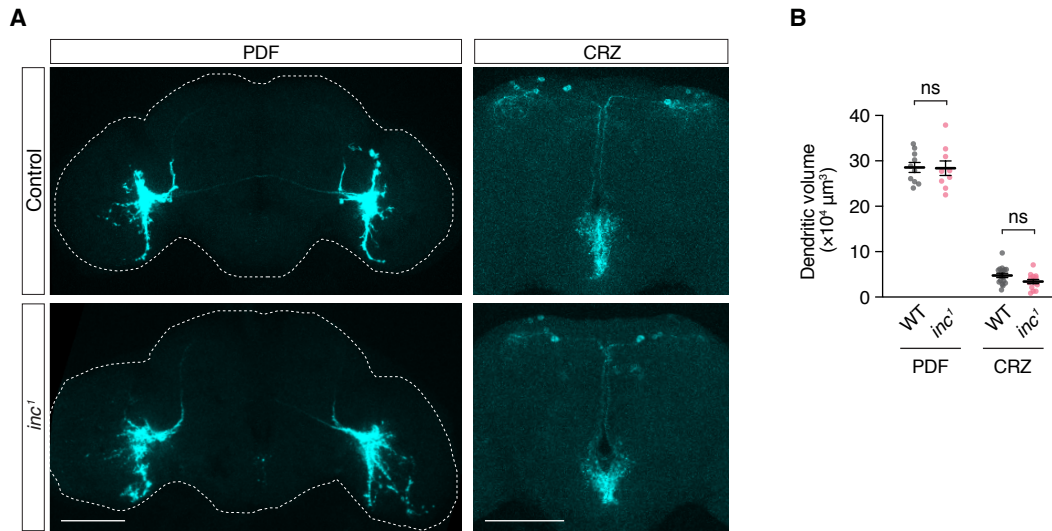

**Figure 7–Figure supplement 2. Analysis of dendrites in additional sleep-regulatory circuits.**

(A) Adult brains from control animals and *inc<sup>1</sup>* mutants expressing *UAS-DenMark-smGdpV5* in PDF and CRZ neurons, stained with anti-GFP (cyan). Scale bars, 100  $\mu\text{m}$ . (B) Quantification of dendritic volume. Bars represent mean  $\pm$  SEM. n = 9–10 (PDF); n = 14–17 (CRZ). ns, p > 0.05, Welch's t-test.
